# Supplementary material for: Effects of Livestock Grazing on Spatio-Temporal Patterns and Behaviour of Reeves’s Pheasant Syrmaticus reevesii
Source: MDPI journal article supplement (doi:10.3390/ani12212968), 2022-10-28
Supplement: s1 [file s1]

## Supplementary Materials

**Table S1:** Specifications of the study design in each study area, including the number and duration of camera traps.

| Study design                                                       | Study area                        |                                   |
|--------------------------------------------------------------------|-----------------------------------|-----------------------------------|
|                                                                    | LKS                               | ZHS                               |
| Camera trap model                                                  | Ltl Acorn 6310 WMC, Zhuhai, China | Ltl Acorn 6310 WMC, Zhuhai, China |
| Sensitivity of the sensor                                          | Medium                            | Medium                            |
| Pictures per photo series                                          | 3 pictures and 1 video            | 3 pictures and 1 video            |
| Delay between photo series                                         | 30s                               | 30s                               |
| Camera trap installation height                                    | 0.3-0.4 m                         | 0.3-0.4 m                         |
| Field measurements to allow estimation of elevation and vegetation | Yes                               | Yes                               |
| Length of deployment periods                                       | 12 months                         | 12 months                         |
| Number of camera traps                                             | 35                                | 37                                |
| Number of camera traps in normal operation                         | 27                                | 33                                |
| Number of damaged camera traps                                     | 1                                 | 1                                 |
| Number of camera traps stolen                                      | 7                                 | 3                                 |

**Table S2:** Covariate collinearity analysis based on variance inflation factor

| Variable                                | VIF  | df | $GVIF^{1/(2 \cdot Df)}$ |
|-----------------------------------------|------|----|-------------------------|
| Distance to the nearest impervious road | 4.5  | 1  | 1.32                    |
| Distance to the nearest settlement      | 4.88 | 1  | 2.21                    |
| Distance to the nearest cultivated land | 1.33 | 1  | 1.15                    |
| Distance to the nearest water           | 3.37 | 1  | 1.84                    |
| Elevation                               | 1.87 | 1  | 1.37                    |
| Livestock encounter rates               | 1.73 | 1  | 1.32                    |
| People encounter rates                  | 1.15 | 1  | 1.1                     |

**Table S3:** Behavioural ethogram used in behavioral analysis of Reeves's Pheasant

| Behaviour        | Definition                                                                                            |
|------------------|-------------------------------------------------------------------------------------------------------|
| Foraging         | Head down cropping the seed or jump up to eat grass.                                                  |
| Vigilance        | Head up on alert posture, even between feeding bouts.                                                 |
| Locomotion       | Running or fast walking without feeding.                                                              |
| Comfort behavior | Standing or sitting with the neck folded and head on shoulder, simply laying down, or preening (<5%). |
| Others           | Less common behaviors, sparring, brood, provisioning, courtship (<5%).                                |

**Table S4:** A two-tailed unpaired two-sample Wilcoxon test was used to examine the difference in camera trap average sampling efforts of ZHS and LKS during breeding season, non-breeding season and the whole year.

| Stage              | Camera trap days |       |        |       | w      | <i>p</i> |
|--------------------|------------------|-------|--------|-------|--------|----------|
|                    | LKS              |       | ZHS    |       |        |          |
|                    | mean             | se    | mean   | se    |        |          |
| Breeding season    | 114.16           | 46.71 | 116.83 | 49.52 | 514.00 | 0.56     |
| Nonbreeding season | 170.71           | 50.60 | 179.31 | 42.49 | 402.50 | 0.47     |
| A whole year       | 259.97           | 90.53 | 268.76 | 90.79 | 558.00 | 0.68     |

**Table S5:** Results of fitting single-species occupancy models to the detection histories of Reeves's Pheasant. We report the best-supported models ( $\Delta AIC < 2$ ) in both breeding and nonbreeding season. The set of competing models for each species consisted of 64 models. (DNR = distance to the nearest road, DNS = distance to the nearest settlement, Ele = elevation, LER = livestock encounter rates).

| Life history | model names                        | K | AIC     | $\Delta AIC$ | AICwt |
|--------------|------------------------------------|---|---------|--------------|-------|
| nonbreeding  |                                    |   |         |              |       |
| season       | psi(DNR)p(location+vegetation)     | 5 | 1446.48 | 0.00         | 0.15  |
|              | psi()p(location+vegetation)        | 4 | 1447.02 | 0.54         | 0.11  |
|              | psi(DNR+DNS)p(location+vegetation) | 6 | 1447.55 | 1.07         | 0.09  |
|              | psi(LER+DNS)p(location+vegetation) | 6 | 1447.57 | 1.09         | 0.08  |
|              | psi(DNR)p(location+Ele)            | 5 | 1448.39 | 1.92         | 0.06  |
| breeding     |                                    |   |         |              |       |
| season       | psi()p(DNR+DNS)                    | 4 | 1813.62 | 0.00         | 0.39  |
|              | psi(location) p(DNR+DNS)           | 5 | 1815.08 | 1.47         | 0.19  |
|              | psi(LER) p(DNR+DNS)                | 5 | 1815.27 | 1.66         | 0.17  |

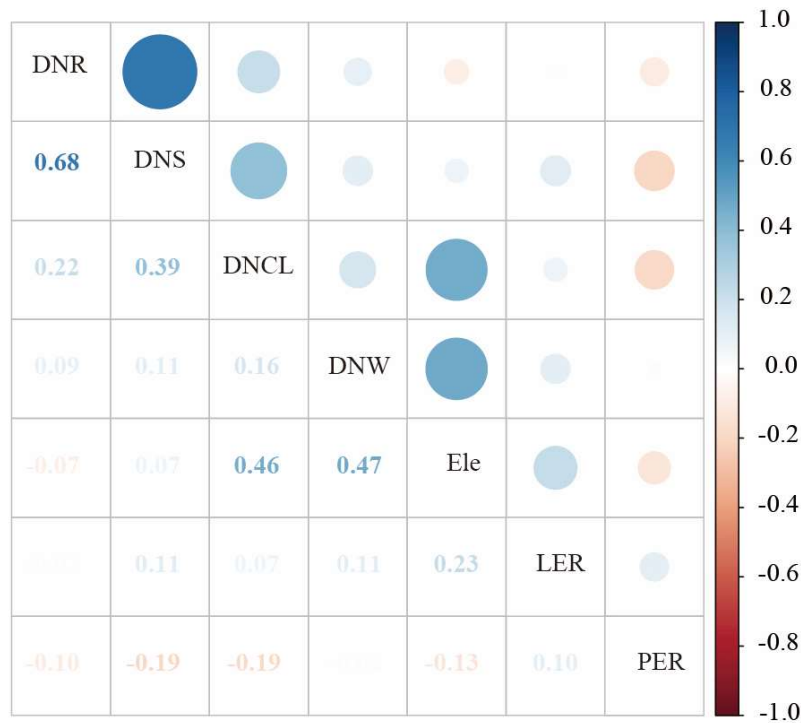

**Figure S1:** Correlation coefficients between the different forest disturbance variables. Numbers on the left reflect pairwise correlation coefficients; circle size and transparency denote the magnitude of correlation. The letters on the diagonal indicate the abbreviation of the covariates (DNR = distance to the nearest road, DNS = distance to the nearest settlement, DNCL= distance to the nearest cultivated land, DNW =distance to the nearest water, Ele = elevation, LER = livestock encounter rates, PER = People encounter rates).

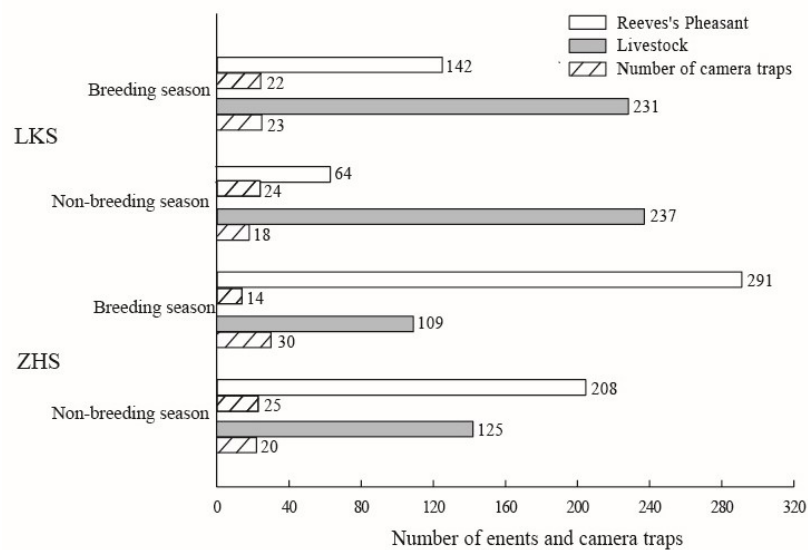

**Figure S2:** The total number of camera traps (CTs) and total number of events using camera traps in LKS and ZHS, China, from July 2018 to July 2019.

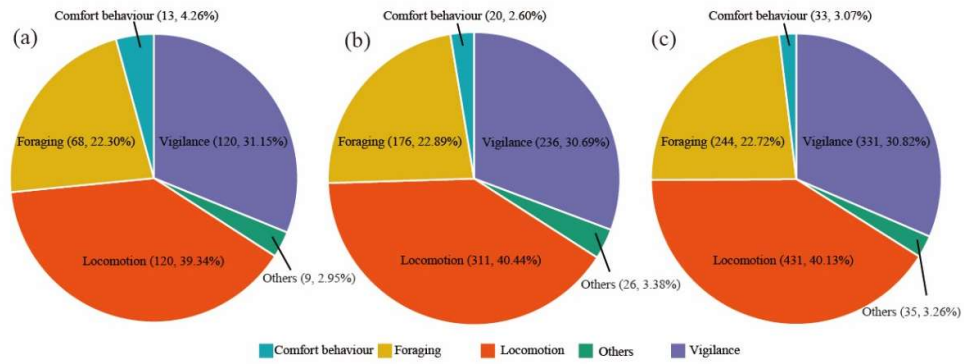

**Figure S3:** Occurrence of the behavioral categories in LKS, ZHS, and both. The five parts of the pie chart represent the five behavior categories, and the numbers in parentheses indicate the number and percentage of behavior occurrences, respectively. (a) LKS, (b) ZHS, (c) both.
